# Supplementary material
Source: MDPI journal article supplement (https://www.mdpi.com/2073-4433/9/8/307)
Supplement: s1 [file s1]

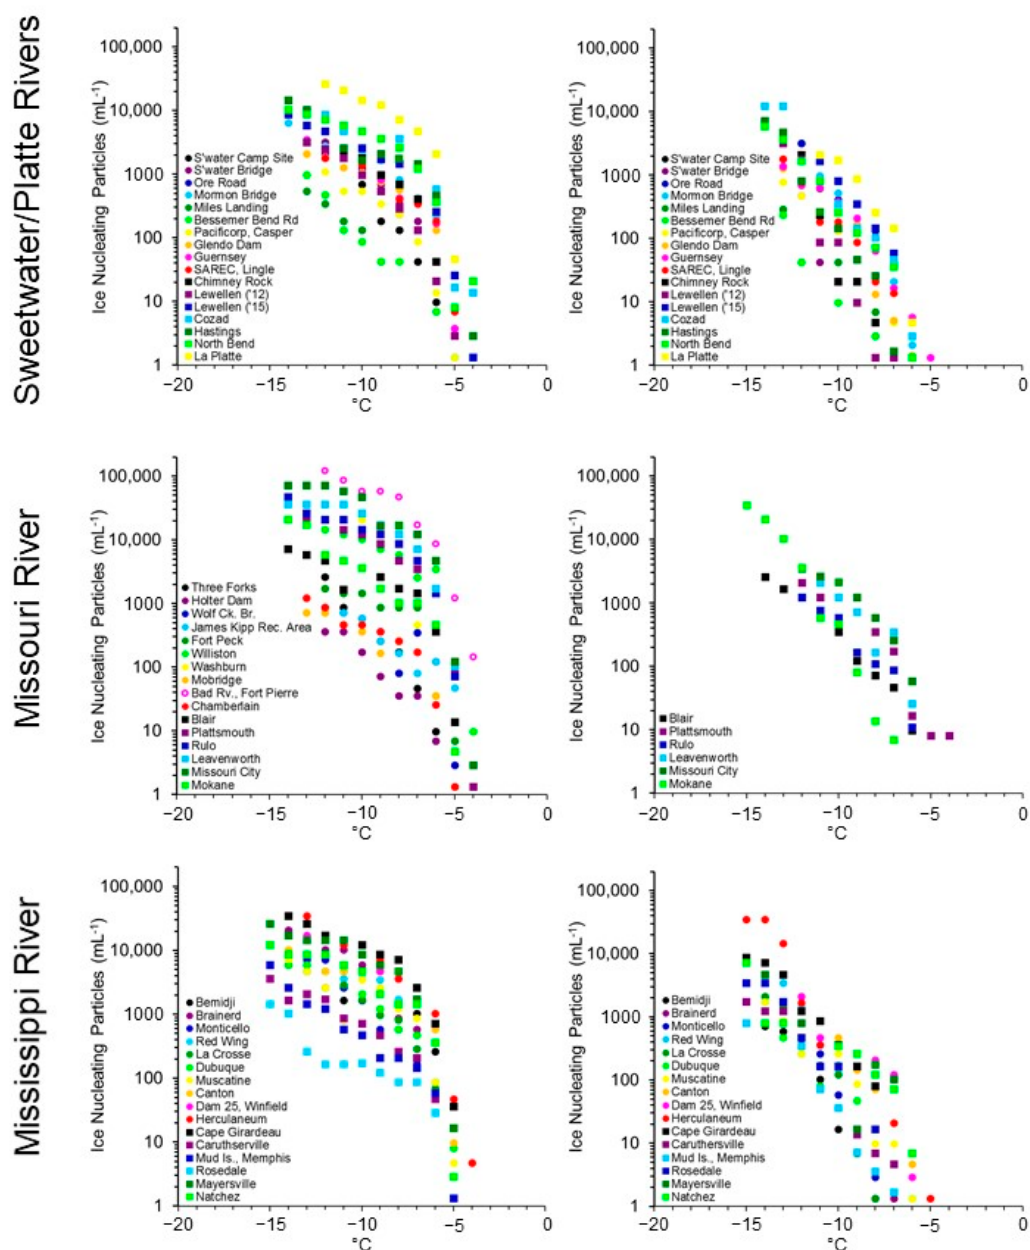

**Figure S1.** Full spectra of ice nucleating particle concentrations in the Sweetwater/Platte, Missouri and Mississippi Rivers. Left column figures show INP spectra in untreated water, while the right column figures all results for heat-treated samples (95 °C for 20 min).

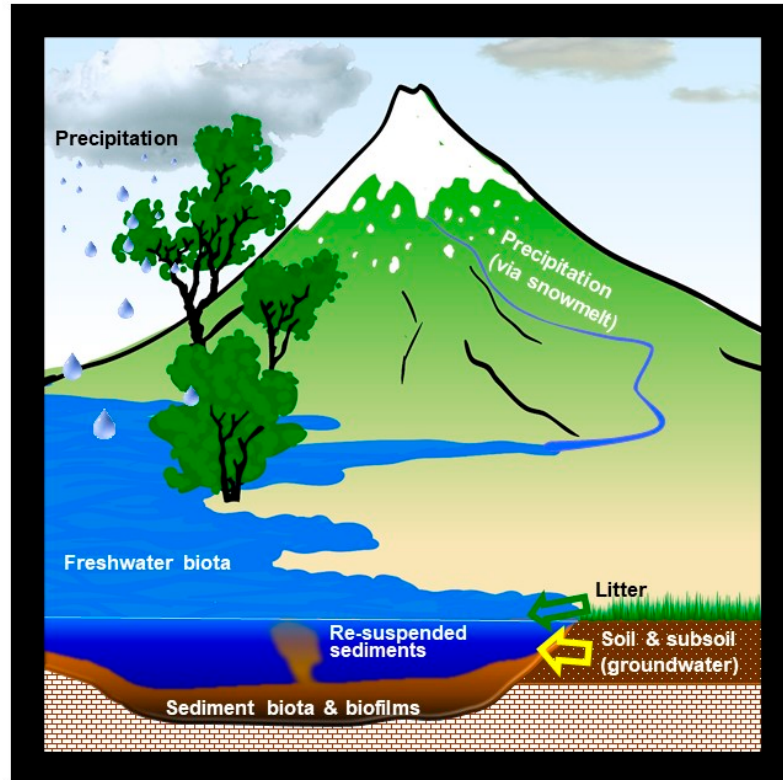

**Figure S2.** Sources of INPs in rivers.
